# Supplementary material for: Estimated Phytate Intake Is Associated with Bone Mineral Density in Mediterranean Postmenopausal Women
Source: MDPI journal article supplement (doi:10.3390/nu15071791), 2023-04-06
Supplement: s1 [file s1]

**Supplementary Table S1.** Odds Ratio and 95% CIs between Low Bone Mineral Density (T-score  $\leq$  -1) and estimated phytate intake (by tertiles and per each 25 mg/100 kcal).

|                                   | <b>Tertile 1</b><br><b>&lt; 15.0</b><br><b>mg/100 kcal</b> | <b>Tertile 2</b><br><b>[15.0 -28.4]</b><br><b>mg/100 kcal</b> | <b>Tertile 3</b><br><b>&gt; 28.4</b><br><b>mg/100 kcal</b> | <b><i>p</i>-value</b><br><b>for</b><br><b>trend</b> | <b>Phytate (per 25</b><br><b>mg/100 kcal)</b> | <b><i>p</i>-value</b> |
|-----------------------------------|------------------------------------------------------------|---------------------------------------------------------------|------------------------------------------------------------|-----------------------------------------------------|-----------------------------------------------|-----------------------|
| <b>Femoral Neck, n</b>            | 185                                                        | 187                                                           | 182                                                        |                                                     | 554                                           |                       |
| T-score $\leq$ -1, n (%)          | 96 (51.9)                                                  | 105 (56.1)                                                    | 80 (44.0)                                                  |                                                     | 281 (50.7)                                    |                       |
| Crude Model                       | 1 (ref.)                                                   | 1.19 (0.79-1.79)                                              | 0.73 (0.48-1.10)                                           | 0.131                                               | 0.77 (0.57-1.03)                              | 0.080                 |
| Adjusted Model*                   | 1 (ref.)                                                   | 1.15 (0.74-1.78)                                              | 0.76 (0.48-1.20)                                           | 0.237                                               | 0.79 (0.57-1.09)                              | 0.144                 |
| <b>Femoral Ward's Triangle, n</b> | 185                                                        | 187                                                           | 181                                                        |                                                     | 553                                           |                       |
| T-score $\leq$ -1, n (%)          | 151 (81.6)                                                 | 146 (78.1)                                                    | 127 (70.2)                                                 |                                                     | 424 (76.7)                                    |                       |
| Crude Model                       | 1 (ref.)                                                   | 0.80 (0.48 - 1.33)                                            | 0.53 (0.32-0.86)                                           | 0.010                                               | 0.62 (0.45-0.87)                              | 0.006                 |
| Adjusted Model*                   | 1 (ref.)                                                   | 0.73 (0.42-1.25)                                              | 0.51 (0.30-0.88)                                           | 0.014                                               | 0.62 (0.43-0.89)                              | 0.010                 |
| <b>Femoral Trochanter, n</b>      | 185                                                        | 187                                                           | 181                                                        |                                                     | 553                                           |                       |
| T-score $\leq$ -1, n (%)          | 38 (20.5)                                                  | 41 (21.9)                                                     | 29 (16.0)                                                  |                                                     | 108 (19.5)                                    |                       |
| Crude Model                       | 1 (ref.)                                                   | 1.09 (0.66-1.79)                                              | 0.74 (0.43-1.26)                                           | 0.279                                               | 0.74 (0.50-1.08)                              | 0.121                 |
| Adjusted Model*                   | 1 (ref.)                                                   | 1.03 (0.61-1.74)                                              | 0.76 (0.42-1.34)                                           | 0.349                                               | 0.74 (0.48-1.12)                              | 0.155                 |
| <b>Total Femur, n</b>             | 177                                                        | 184                                                           | 177                                                        |                                                     | 538                                           |                       |
| T-score $\leq$ -1, n (%)          | 43 (24.3%)                                                 | 60 (32.6%)                                                    | 40 (22.6%)                                                 |                                                     | 143 (26.6)                                    |                       |
| Crude Model                       | 1 (ref.)                                                   | 1.51 (0.95-2.39)                                              | 0.91 (0.56-1.49)                                           | 0.718                                               | 0.95 (0.68-1.32)                              | 0.741                 |
| Adjusted Model*                   | 1 (ref.)                                                   | 1.42 (0.86-2.34)                                              | 0.92 (0.53-1.58)                                           | 0.758                                               | 0.93 (0.64-1.36)                              | 0.720                 |
| <b>Lumbar Spine L1-L2, n</b>      | 148                                                        | 157                                                           | 164                                                        |                                                     | 469                                           |                       |
| T-score $\leq$ -1, n (%)          | 91 (61.5)                                                  | 97 (61.8)                                                     | 86 (52.4)                                                  |                                                     | 274 (58.4)                                    |                       |
| Crude Model                       | 1 (ref.)                                                   | 1.01 (0.64-1.61)                                              | 0.69 (0.44-1.08)                                           | 0.100                                               | 0.74 (0.54-1.01)                              | 0.060                 |
| Adjusted Model*                   | 1 (ref.)                                                   | 0.90 (0.55-1.47)                                              | 0.72 (0.44-1.19)                                           | 0.190                                               | 0.76 (0.54-1.08)                              | 0.127                 |
| <b>Lumbar Spine L1-L3, n</b>      | 147                                                        | 157                                                           | 164                                                        |                                                     | 468                                           |                       |
| T-score $\leq$ -1, n (%)          | 80 (54.4)                                                  | 85 (54.1)                                                     | 68 (41.5)                                                  |                                                     | 232 (49.8)                                    |                       |
| Crude Model                       | 1 (ref.)                                                   | 0.99 (0.63-1.55)                                              | 0.59 (0.38-0.93)                                           | 0.021                                               | 0.73 (0.54-1.01)                              | 0.057                 |
| Adjusted Model*                   | 1 (ref.)                                                   | 0.90 (0.55-1.46)                                              | 0.61 (0.37-1.00)                                           | 0.046                                               | 0.76 (0.54-1.07)                              | 0.118                 |
| <b>Lumbar Spine L1-L4, n</b>      | 147                                                        | 156                                                           | 165                                                        |                                                     | 468                                           |                       |
| T-score $\leq$ -1, n (%)          | 72 (49.0)                                                  | 78 (50.0)                                                     | 62 (37.6)                                                  |                                                     | 212 (45.3)                                    |                       |
| Crude Model                       | 1 (ref.)                                                   | 1.04 (0.66-1.63)                                              | 0.63 (0.40-0.98)                                           | 0.039                                               | 0.72 (0.53-0.99)                              | 0.045                 |

|                              |           |                  |                  |       |                  |       |
|------------------------------|-----------|------------------|------------------|-------|------------------|-------|
| Adjusted Model*              | 1 (ref.)  | 0.95 (0.59-1.55) | 0.64 (0.39-1.06) | 0.079 | 0.75 (0.53-1.06) | 0.101 |
| <b>Lumbar Spine L2-L3, n</b> | 167       | 171              | 176              |       | 514              |       |
| T-score ≤ -1, n (%)          | 90 (53.9) | 88 (51.5)        | 73 (41.5)        |       | 251 (48.8)       |       |
| Crude Model                  | 1 (ref.)  | 0.91 (0.59-1.39) | 0.61 (0.40-0.93) | 0.021 | 0.71 (0.53-0.97) | 0.029 |
| Adjusted Model*              | 1 (ref.)  | 0.83 (0.52-1.32) | 0.62 (0.39-1.00) | 0.048 | 0.72 (0.52-1.00) | 0.052 |
| <b>Lumbar Spine L2-L4, n</b> | 167       | 170              | 177              |       | 514              |       |
| T-score ≤ -1, n (%)          | 80 (47.9) | 79 (46.5)        | 66 (37.3)        |       | 225 (43.8)       |       |
| Crude Model                  | 1 (ref.)  | 0.94 (0.62-1.45) | 0.65 (0.42-0.99) | 0.046 | 0.73 (0.53-0.99) | 0.041 |
| Adjusted Model*              | 1 (ref.)  | 0.86 (0.54-1.37) | 0.64 (0.40-1.03) | 0.063 | 0.7 (20.52-1.01) | 0.056 |
| <b>Lumbar Spine L3-L4, n</b> | 167       | 170              | 176              |       | 513              |       |
| T-score ≤ -1, n (%)          | 75 (44.9) | 71 (41.8)        | 63 (35.8)        |       | 209 (40.7)       |       |
| Crude Model                  | 1 (ref.)  | 0.88 (0.57-1.35) | 0.68 (0.44-1.06) | 0.086 | 0.76 (0.56-1.04) | 0.087 |
| Adjusted Model*              | 1 (ref.)  | 0.81 (0.51-1.28) | 0.68 (0.42-1.09) | 0.107 | 0.76 (0.5-1.07)  | 0.113 |

Logistic regression models were used to evaluate the association between low BMD and estimated tertiles of phytate intake. Results are expressed as odds ratio (95% CIs). T-score ≤ -1 was considered as “low BMD” whereas T-score > -1 was considered “normal BMD.” Models adjusted for age (years), BMI (kg/m<sup>2</sup>), physical activity (MET•min/week), educational level (higher education/technician or secondary education/primary education or less), smoking status (never/former/current), type 2 diabetes prevalence, osteoporotic fractures prevalence, energy (kcal/day), calcium (mg/day), vitamin D (µg/day), glycemic index, vegetables and fruits (g/day).
